# Supplementary material for: Green synthesis of nanoscale cobalt(ii)-based MOFs: highly efficient photo-induced green catalysts for the degradation of industrially used dyes
Source: Royal Society of Chemistry journal article supplement (doi:10.1039/c9dt02394a), 2019-01-01
Supplement: c9dt02394a1.pdf [file c9dt02394a1.pdf]

## Green synthesis of nano scale cobalt(II) based MOFs: highly efficient photo-induced green catalysts for degradation of industrially used dyes

Arnab Mandal,<sup>a</sup> Sumi Ganguly,<sup>b</sup> Somali Mukherjee,<sup>a</sup> and Debasis Das\*,<sup>a</sup>

<sup>a</sup> Department of Chemistry, University of Calcutta, 92, A. P. C. Road, Kolkata 700009, India

<sup>b</sup> Sister Nibedita Government General Degree College for Girls, 20B, Judges Court Road, Kolkata 700027, India

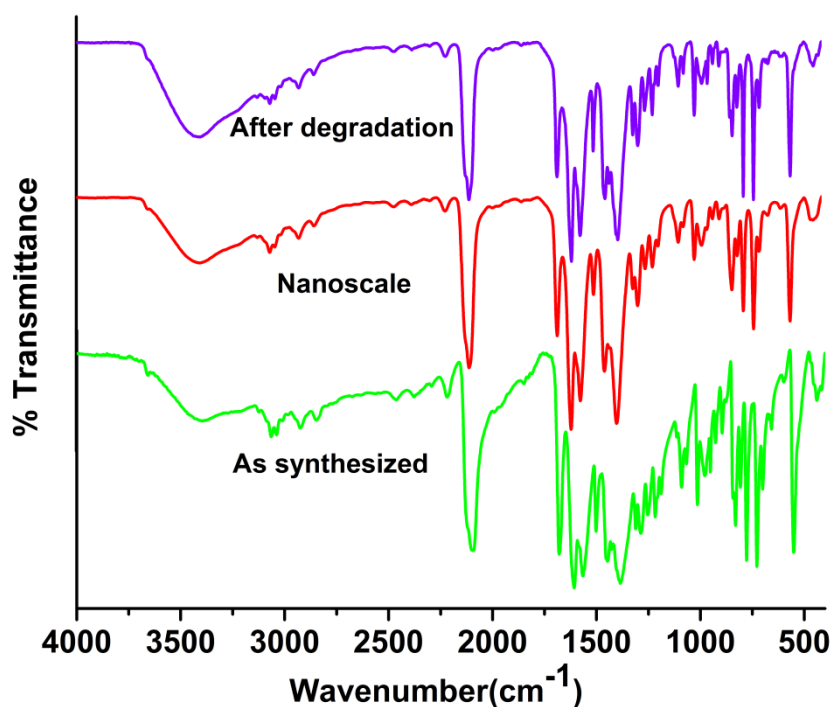

**Fig. S1** FTIR spectrum of as synthesized, nanoscale and after degradation of MOF **1** at room temperature.

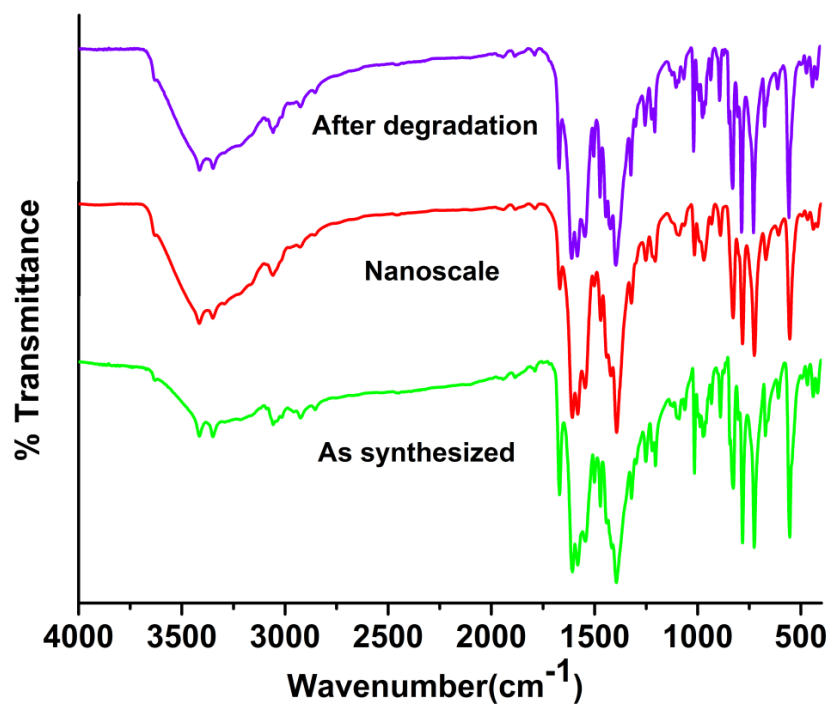

**Fig. S2** FTIR spectrum of as synthesized, nanoscale and after degradation of MOF 2 at room temperature.

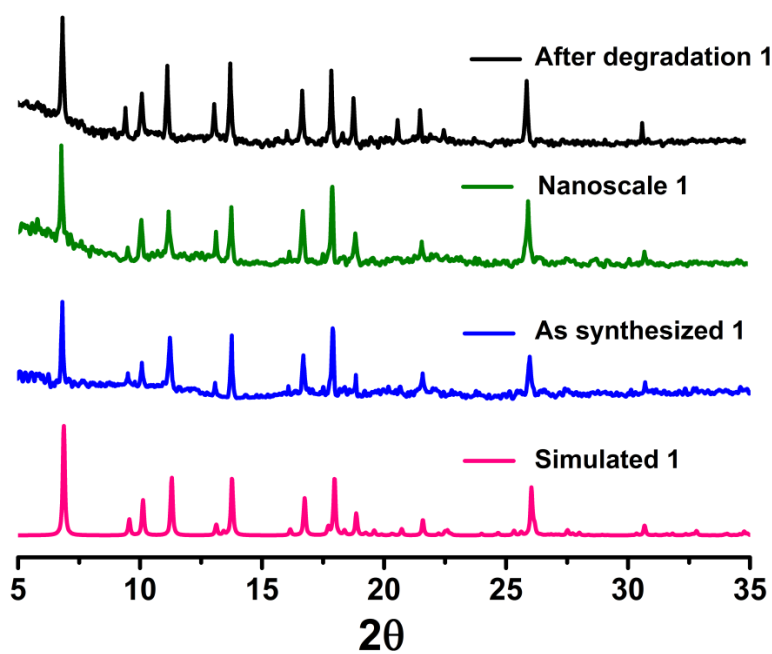

**Fig. S3** PXRD patterns of Simulated, as synthesized, nanoscale and after degradation of MOF 1 collected under air.

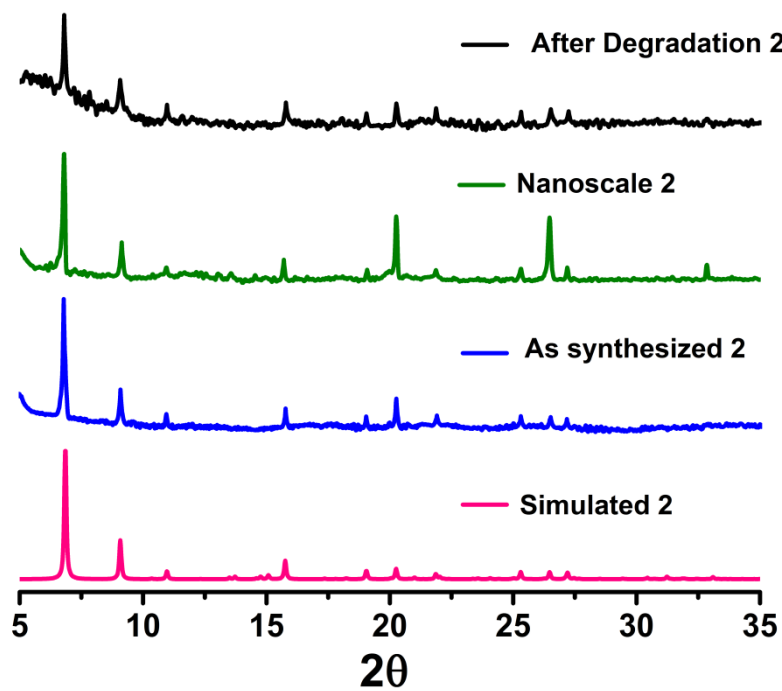

**Fig. S4** PXRD patterns of Simulated, as synthesized, nanoscale and after degradation of MOF 2 collected under air.

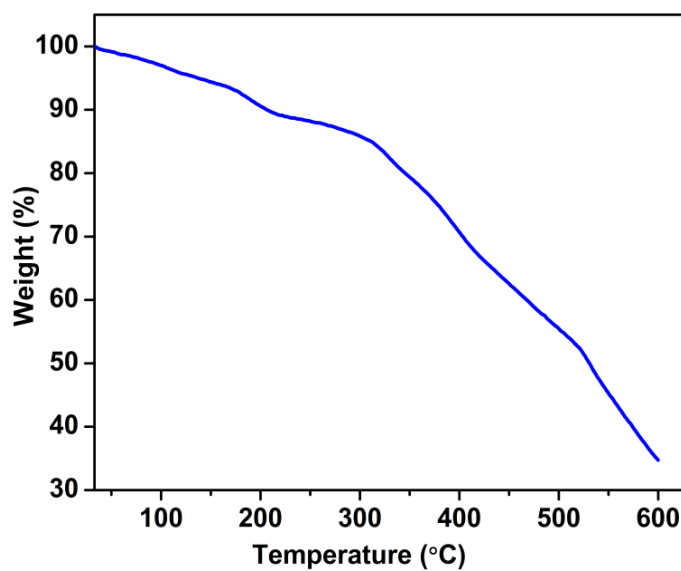

**Fig. S5** TGA curve of MOF 1 collected under  $\text{N}_2$  atmosphere.

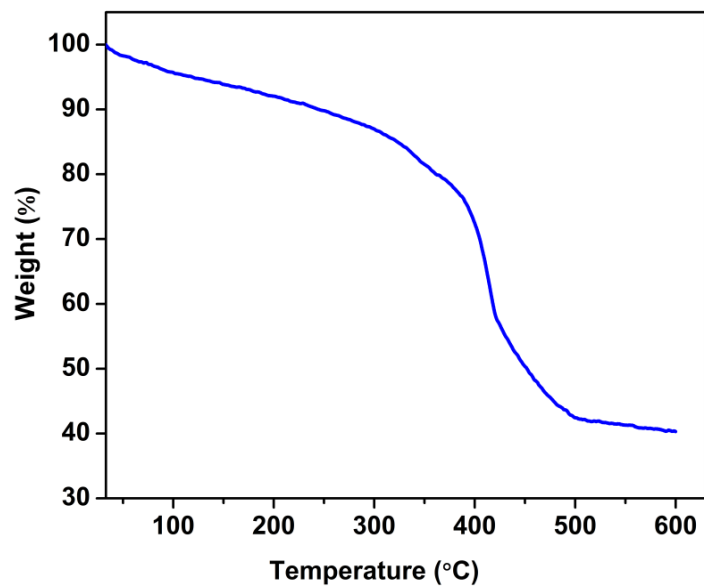

**Fig. S6** TGA curve of MOF 2 collected under N<sub>2</sub> atmosphere.

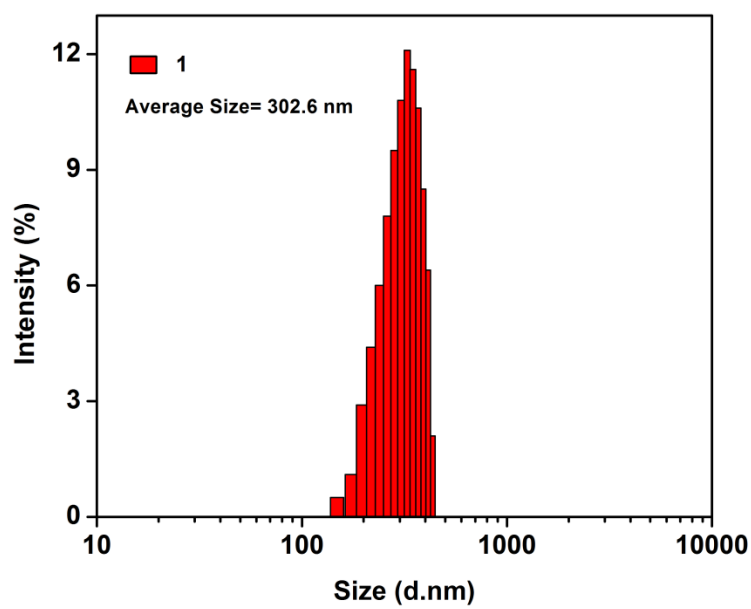

**Fig. S7** DLS plot of water dispersed NMOF 1

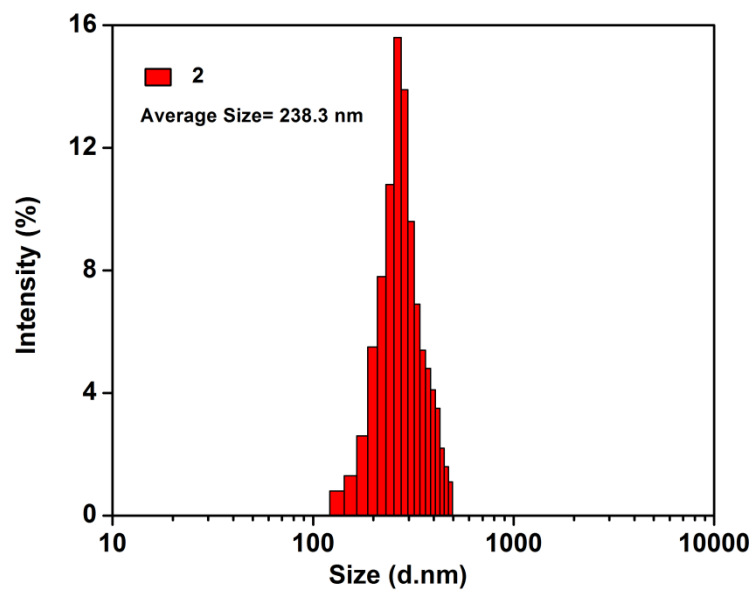

**Fig. S8** DLS plot of water dispersed NMOF 2

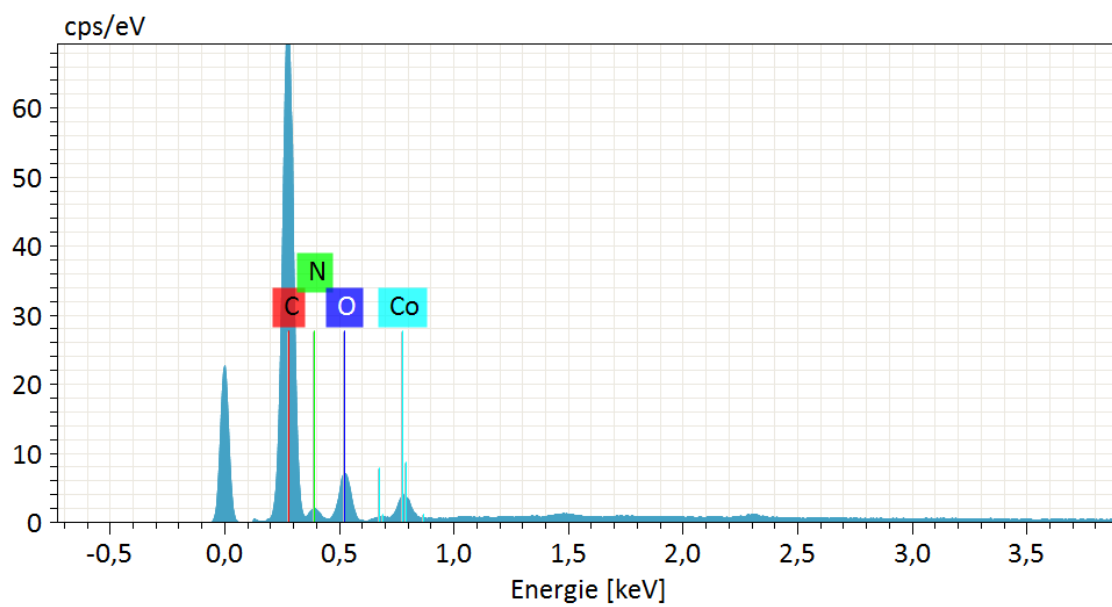

**Fig. S9** EDX spectrum of MOF 1

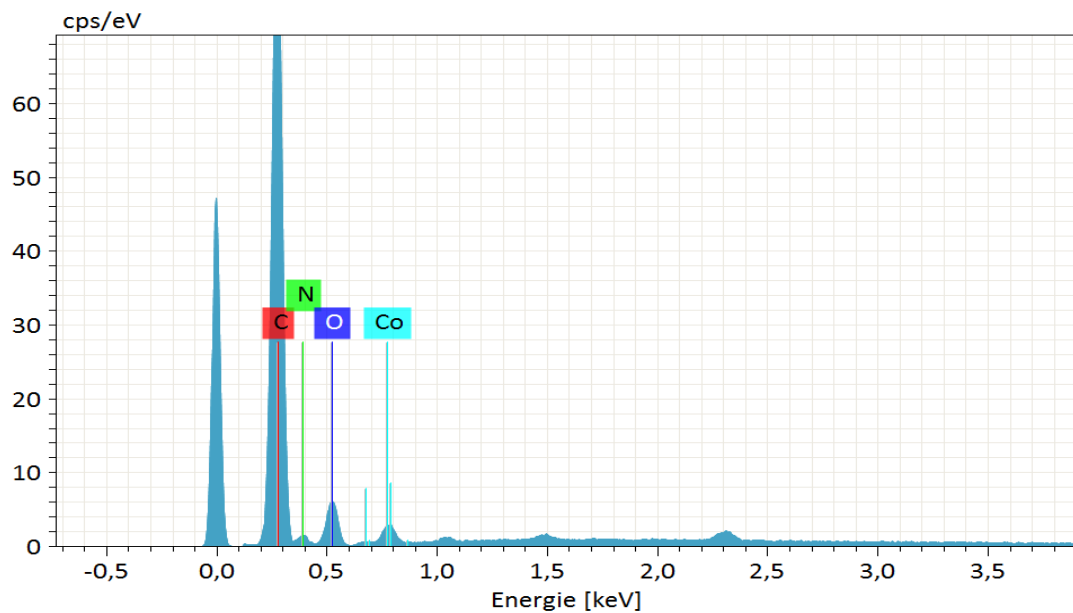

**Fig. S10** EDX spectrum of MOF 2

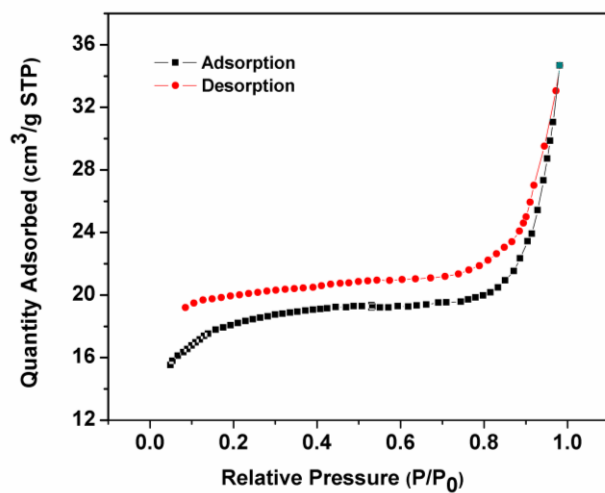

(a)

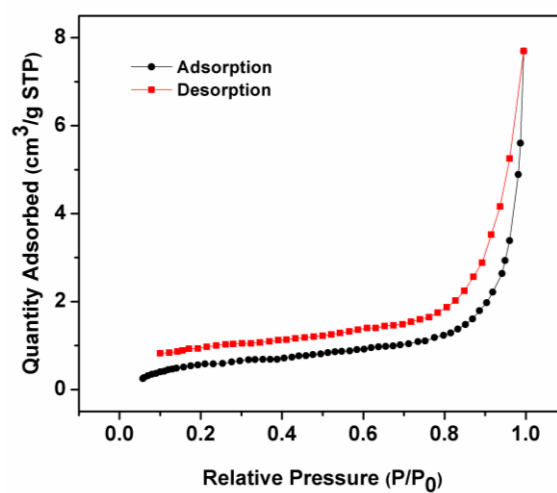

(b)

**Fig. S11** N<sub>2</sub> adsorption isotherm of (a) MOF 1 and (b) MOF 2

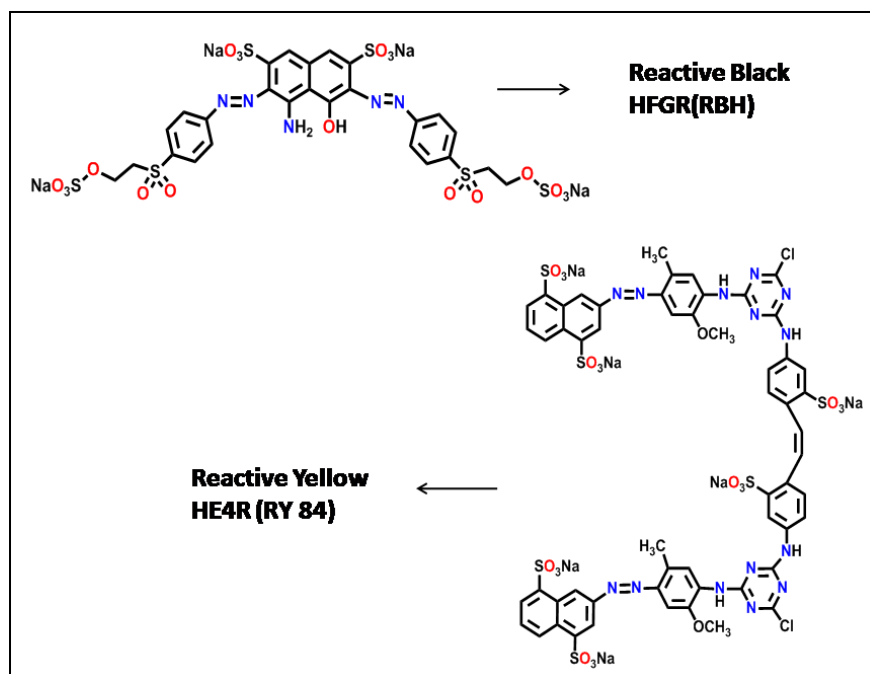

**Fig. S12** Structure of the dye RBH and RY84.

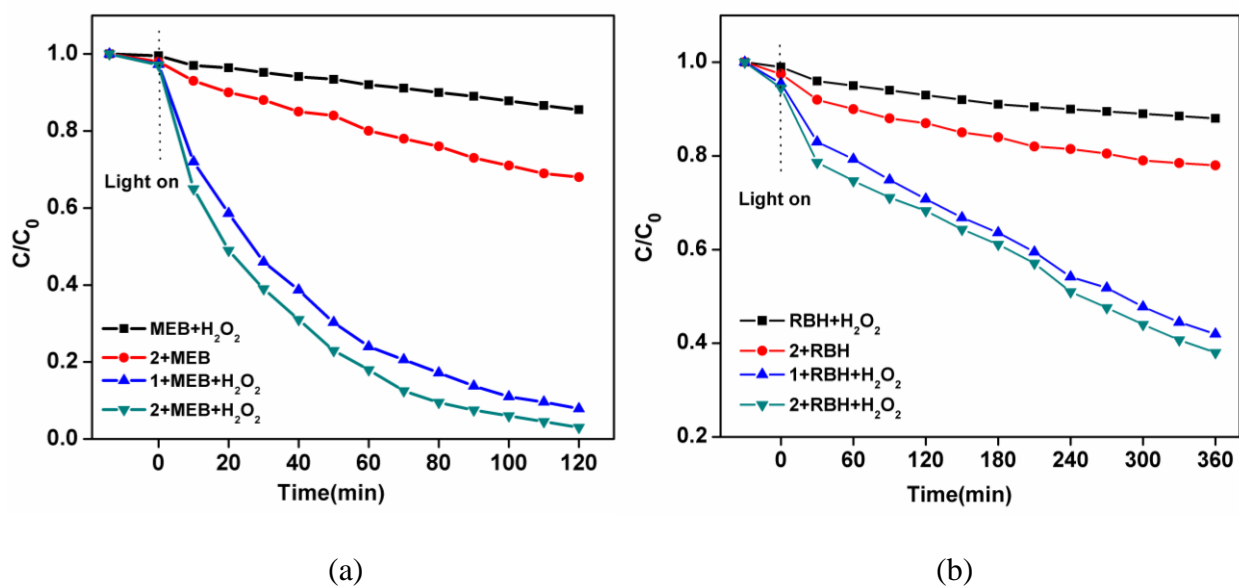

**Fig. S13** Control experiments and the photocatalytic degradation using visible light of the dye (a) MEB and (b) RBH .

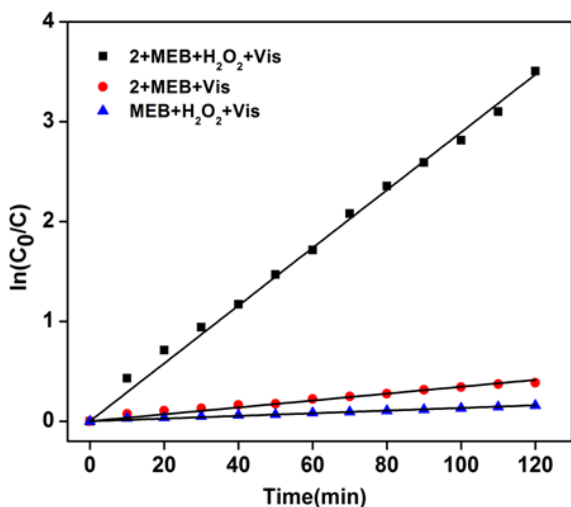

(a)

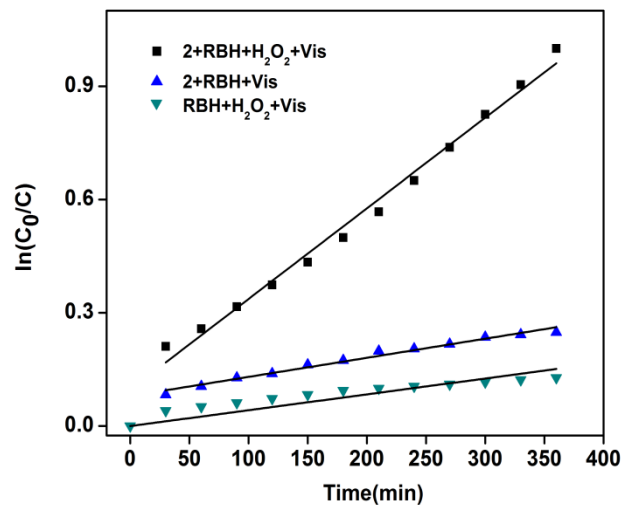

(b)

**Fig. S14** Plot of  $\ln(C_0/C_t)$  vs time for the pseudo first order kinetics curves of the photocatalytic degradation of (a) MEB and (b) RBH.

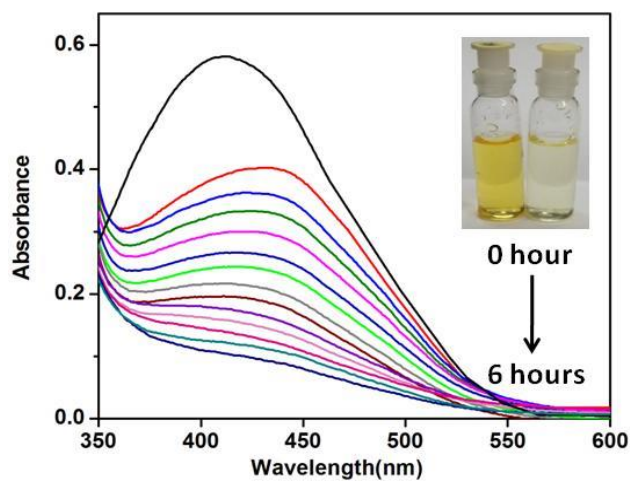

(a)

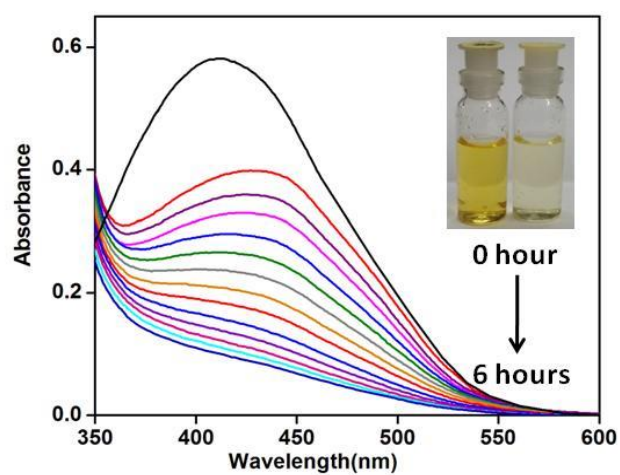

(b)

**Fig. S15** Time dependent UV scan for photodegradation of the dye RY84 with (a) NMOF 1 and (b) NMOF 2 at room temperature.



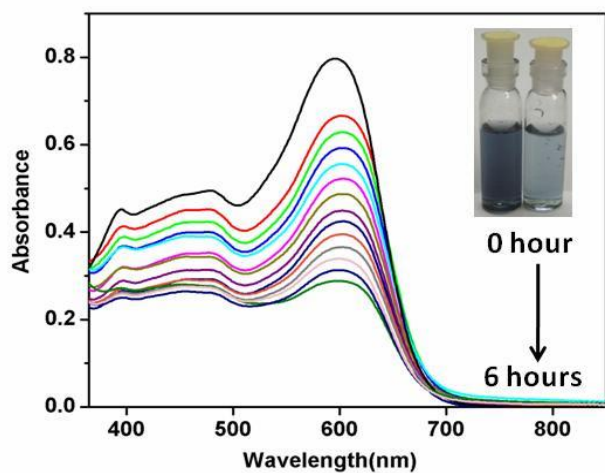

(a)

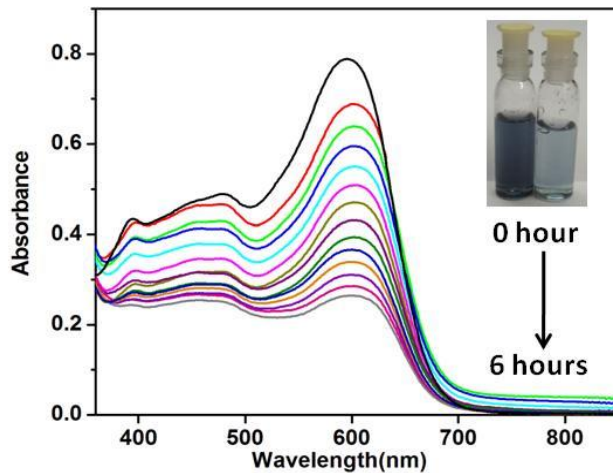

(b)

**Fig. S16** Time dependent UV scan for photodegradation of the dye RBH with (a) NMOF **1** and (b) NMOF **2** at room temperature.

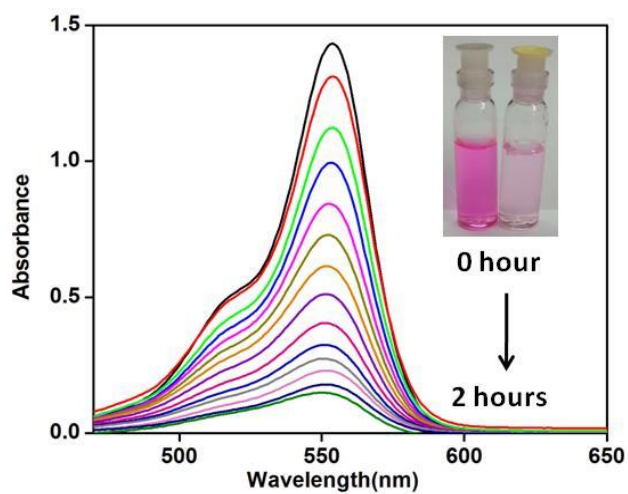

(a)

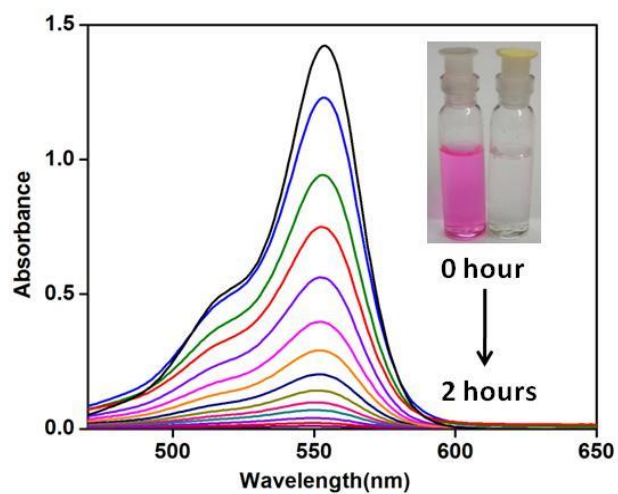

(b)

**Fig. S17** Time dependent UV scan for photodegradation of the dye RhB with (a) NMOF **1** and (b) NMOF **2** at room temperature.

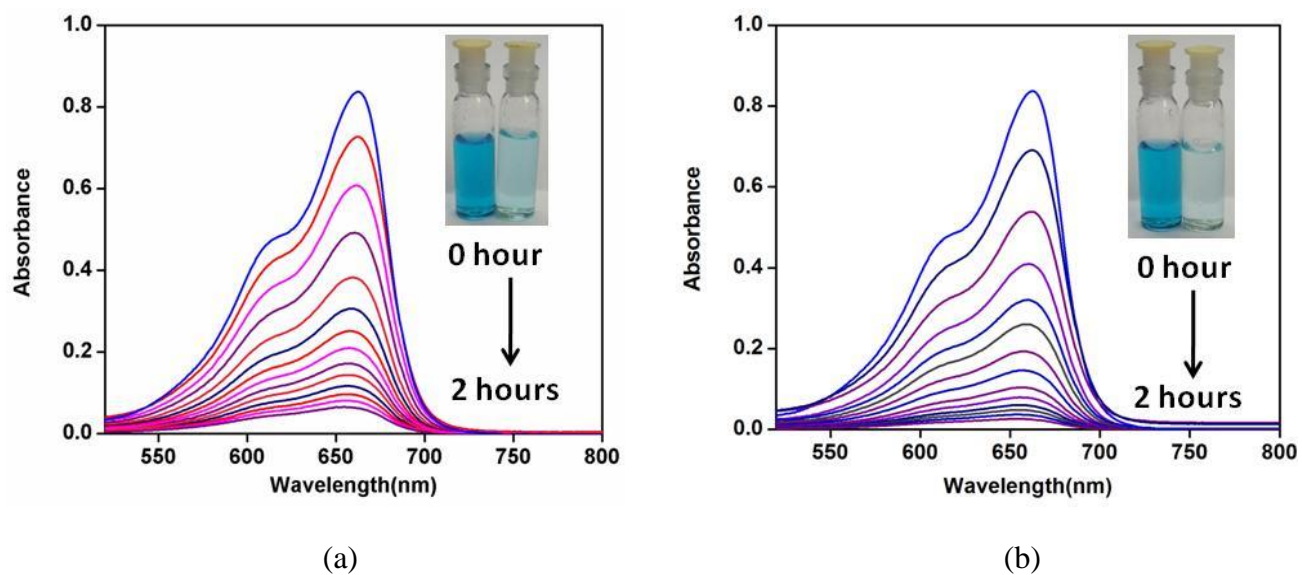

**Fig. S18** Time dependent UV scan for photodegradation of the dye MEB with (a) NMOF **1** and (b) NMOF **2** at room temperature.

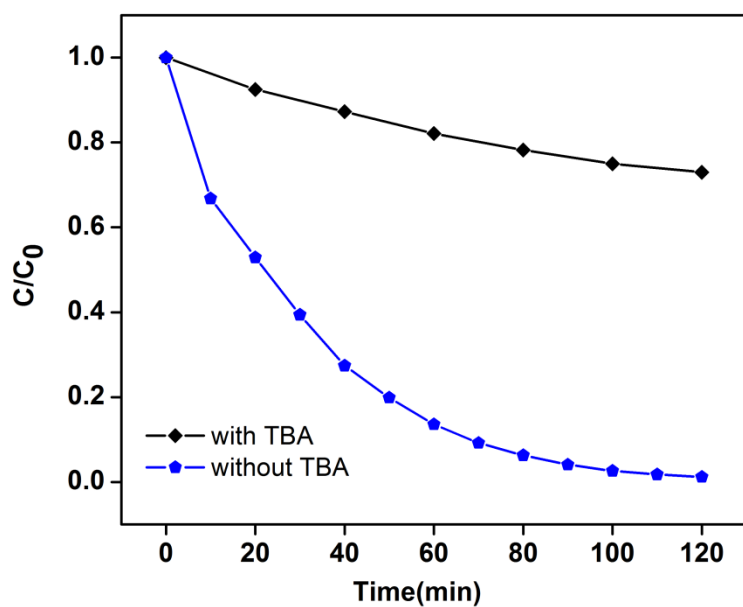

**Fig. S19** Photocatalytic degradation of RhB by NMOF **2** with and without TBA.

**Table S1** Some Selected Bond Angles (°) and Bond Lengths (Å) of **1**

| Bond distance (Å) |          | Bond angle(°) |           |           |            |
|-------------------|----------|---------------|-----------|-----------|------------|
| Co1-O1            | 2.142(3) | O1-Co1-N1     | 90.52(11) | N1-Co1-N2 | 177.28(14) |
| Co1-N1            | 2.155(4) | O1-Co1-N2     | 91.57(11) | N1-Co1-N3 | 88.89(15)  |
| Co1-N2            | 2.165(4) | O1-Co1-N3     | 140.26(6) | N2-Co1-N3 | 88.39(15)  |
| Co1-N3            | 2.157(4) |               |           |           |            |

**Table S2** Some Selected Bond Angles (°) and Bond Lengths (Å) of **2**

| Bond distance (Å) |          | Bond angle(°) |            |           |            |
|-------------------|----------|---------------|------------|-----------|------------|
| Co1-O1            | 2.209(4) | O1-Co1-O2     | 59.85(13)  | O2-Co1-O4 | 152.01(13) |
| Co1-O2            | 2.132(3) | O1-Co1-O3     | 147.97(12) | O2-Co1-N1 | 92.91(15)  |
| Co1-O3            | 2.023(3) | O1-Co1-O4     | 92.19(12)  | O2-Co1-N2 | 91.24(15)  |
| Co1-O4            | 2.033(3) | O1-Co1-N1     | 88.29(17)  | O3-Co1-O4 | 119.23(12) |
| Co1-N1            | 2.138(5) | O1-Co1-N2     | 95.29(14)  | O3-Co1-N1 | 87.39(18)  |
| Co1-N2            | 2.112(4) | O2-Co1-O3     | 88.70(13)  | N1-Co1-N2 | 175.50(16) |
